# Supplementary material for: Demonstrating the In Vitro and In Situ Antimicrobial Activity of Oxide Mineral Microspheres: An Innovative Technology to Be Incorporated into Porous and Nonporous Materials
Source: Pharmaceutics. 2023 Apr 17;15(4):1261. doi: 10.3390/pharmaceutics15041261 (PMC10144421; doi:10.3390/pharmaceutics15041261)
Supplement: Supplementary file 1 [file pharmaceutics-15-01261-s001.zip › pharmaceutics-2277482-supplementary.pdf]

# Supplementary Materials: Demonstrating the In Vitro and In Situ Antimicrobial Activity of Oxide Mineral Microspheres: An Innovative Technology to Be Incorporated into Porous and Nonporous Materials

Katia Iskandar, Sophie Pecastaings, Céline LeGac, Sylvie Salvatico, Catherine Feuillolay, Mylène Guittard, Loïc Marchin, Marc Verelst, and Christine Roques

Table S1. Tested high touch zones under authentic environmental conditions

|                                         | Tested high touch zones |    |             |    |                           |    |              |    |                |    |
|-----------------------------------------|-------------------------|----|-------------|----|---------------------------|----|--------------|----|----------------|----|
|                                         | Bench                   |    | Door handle |    | Hydroalcoholic gel button |    | Mouse Tablet |    | Remote control |    |
| Conditions of temperature and humidity  | CFU/25cm <sup>2</sup>   |    |             |    |                           |    |              |    |                |    |
| To: 20.8°C - 24°C<br>RH: 25% - 31%      | 56                      | 7  | 54          | 1  | 0                         | 0  | 300          | 8  | 3              | 40 |
| To: 21°C - 25°C<br>RH:25% - 36%         | 35                      | 16 | 3           | 6  | 23                        | 3  | 14           | 20 | 11             | 0  |
| To: 21°C - 25°C<br>RH:26% - 34%         | 28                      | 1  | 60          | 1  | 7                         | 0  | 4            | 6  | 3              | 0  |
| To: 22 °C - 26.5 °C<br>RH:32% - 50%     | 7                       | 5  | >300        | 13 | 1                         | 0  | 13           | 1  | 12             | 0  |
| To: 20.5 °C - 25°C<br>RH: 34% - 46%     | 31                      | 11 | 109         | 5  | 1                         | 5  | 2            | 3  | 0              | 9  |
| To: 21°C - 26°C<br>RH:31% - 41%         | 3                       | 2  | 79          | 0  | 6                         | 2  | 15           | 1  | 15             | 0  |
| To: 23°C - 27 °C<br>RH:43% - 63 %       | 9                       | 4  | 7           | 33 | 1                         | 1  | 0            | 1  | 9              | 0  |
| Total number of CFU/25cm <sup>2</sup> * | 466                     | 45 | 570         | 52 | 331                       | 12 | 396          | 40 | 640            | 46 |
| % of microbial reduction                | 90.34%                  |    | 90.88%      |    | 96.37%                    |    | 89.90%       |    | 92.81%         |    |

Columns in gray are tested zones without polyethylene adhesive film. Column in white are tested zones with polyethylene adhesive film; The average percentage of CFU/25cm<sup>2</sup> reduction is 92.06%, \*  $p=0.001$ .
